# Supplementary material for: Computational description of key spectroscopic features of zeolite SSZ-13
Source: Royal Society of Chemistry journal article supplement (doi:10.1039/c9cp03146d), 2019-01-01
Supplement: c9cp03146d1.xlsx [file c9cp03146d1.xlsx]

## Sheet: 1Al
1Al
T[K]	G(T) [eV]
	1	2	3	4
300	-283.287	-283.228	-283.208	-283.193
325	-283.475	-283.415	-283.396	-283.381
350	-283.674	-283.614	-283.597	-283.58
375	-283.885	-283.824	-283.809	-283.791
400	-284.107	-284.046	-284.032	-284.013
425	-284.339	-284.277	-284.265	-284.245
450	-284.582	-284.519	-284.509	-284.488
475	-284.835	-284.771	-284.762	-284.741
500	-285.097	-285.033	-285.026	-285.004
525	-285.369	-285.304	-285.298	-285.275
550	-285.65	-285.584	-285.58	-285.556
575	-285.939	-285.873	-285.871	-285.846
600	-286.238	-286.171	-286.17	-286.144
625	-286.544	-286.476	-286.477	-286.451
650	-286.858	-286.79	-286.792	-286.765
675	-287.181	-287.112	-287.116	-287.087
700	-287.511	-287.441	-287.446	-287.417
725	-287.848	-287.777	-287.785	-287.755
750	-288.192	-288.121	-288.13	-288.099
775	-288.544	-288.472	-288.482	-288.451
800	-288.902	-288.83	-288.842	-288.81
	IR Wavenumbers [1/cm]
	3662.32	3627.77	3632.86	3628.49
	P (T)
300	0.850399	0.0878433	0.0396102	0.0221474
400	0.742568	0.125345	0.0835139	0.0485735
500	0.653811	0.147647	0.12429	0.074252
600	0.58585	0.160433	0.157607	0.0961098
700	0.53428	0.16784	0.183876	0.114004
800	0.494652	0.172218	0.204552	0.128578
NMR	chemical shift [ppm]
element	Al	Si(O1)	Si(O2)	Si(O3)	Si(O4)	Si	Si	Si	Si	Si	Si	Si
noH	65.2599	-109.991	-110.028	-108.94	-110.979	-115.52	-114.641	-114.445	-114.389	-114.335	-113.553	-114.323
1	63.4923	-118.173	-110.935	-110.572	-109.947	-115.963	-116.513	-114.385	-116.801	-116.043	-114.027	-116.208
2	70.5128	-109	-107.516	-110.28	-111.17	-117.022	-115.479	-114.615	-113.561	-115.737	-114.769	-115.047
3	65.45	-112.314	-109.608	-113.796	-112.218	-115.032	-114.806	-114.325	-117.293	-116.132	-115.58	-116.741
4	69.595	-110.402	-110.255	-109.258	-110.104	-114.102	-116.128	-116.366	-115.464	-116.319	-115.588	-115.52
1 OH
2OH
27Al-NMR	CQ [MHz]	η
1	16.541	0.228
2	14.798	0.305
3	17.516	0.113
4	14.328	0.154

## Sheet: 2Al-A
2Al-A
T[K]	G(T) [eV]
	1-1	1-2	1-3	1-4	2-1	2-2	2-3	2-4	3-1	3-2	3-3	3-4	4-1	4-2	4-3	4-4
300	-284.851	-284.452	-284.775	-284.718	-284.923	-284.347	-284.789	-284.756	-284.74	-284.822	-284.467	-284.888	-284.709	-284.78	-284.898	-284.737
325	-285.037	-284.638	-284.964	-284.897	-285.116	-284.533	-284.969	-284.941	-284.925	-285.007	-284.653	-285.077	-284.889	-284.97	-285.087	-284.925
350	-285.235	-284.835	-285.165	-285.088	-285.322	-284.731	-285.161	-285.138	-285.121	-285.204	-284.851	-285.277	-285.079	-285.171	-285.289	-285.125
375	-285.443	-285.044	-285.377	-285.291	-285.54	-284.94	-285.363	-285.346	-285.328	-285.412	-285.06	-285.489	-285.281	-285.384	-285.502	-285.336
400	-285.663	-285.263	-285.601	-285.504	-285.768	-285.16	-285.576	-285.565	-285.546	-285.631	-285.28	-285.712	-285.494	-285.608	-285.726	-285.558
425	-285.893	-285.494	-285.835	-285.727	-286.007	-285.391	-285.8	-285.795	-285.774	-285.86	-285.511	-285.945	-285.717	-285.843	-285.96	-285.791
450	-286.133	-285.735	-286.079	-285.961	-286.257	-285.632	-286.034	-286.034	-286.013	-286.1	-285.752	-286.189	-285.95	-286.088	-286.205	-286.034
475	-286.384	-285.985	-286.333	-286.204	-286.517	-285.883	-286.277	-286.284	-286.262	-286.35	-286.003	-286.443	-286.193	-286.343	-286.46	-286.287
500	-286.644	-286.246	-286.598	-286.457	-286.787	-286.144	-286.53	-286.544	-286.52	-286.609	-286.263	-286.707	-286.446	-286.608	-286.725	-286.55
525	-286.913	-286.516	-286.871	-286.719	-287.067	-286.414	-286.793	-286.813	-286.788	-286.877	-286.533	-286.98	-286.708	-286.882	-286.999	-286.823
550	-287.192	-286.795	-287.154	-286.99	-287.356	-286.693	-287.064	-287.09	-287.065	-287.155	-286.812	-287.262	-286.979	-287.165	-287.282	-287.104
575	-287.479	-287.082	-287.445	-287.269	-287.653	-286.981	-287.344	-287.377	-287.35	-287.441	-287.1	-287.553	-287.258	-287.458	-287.575	-287.395
600	-287.774	-287.379	-287.746	-287.558	-287.96	-287.278	-287.632	-287.672	-287.644	-287.736	-287.396	-287.853	-287.546	-287.758	-287.875	-287.694
625	-288.078	-287.683	-288.054	-287.854	-288.275	-287.583	-287.929	-287.976	-287.947	-288.039	-287.701	-288.161	-287.842	-288.068	-288.185	-288.001
650	-288.39	-287.996	-288.371	-288.158	-288.598	-287.896	-288.233	-288.287	-288.257	-288.351	-288.013	-288.478	-288.146	-288.385	-288.502	-288.317
675	-288.71	-288.317	-288.695	-288.47	-288.929	-288.217	-288.545	-288.606	-288.575	-288.67	-288.334	-288.802	-288.458	-288.71	-288.827	-288.64
700	-289.038	-288.645	-289.028	-288.79	-289.268	-288.546	-288.865	-288.933	-288.901	-288.996	-288.662	-289.134	-288.777	-289.043	-289.16	-288.971
725	-289.372	-288.981	-289.367	-289.116	-289.614	-288.882	-289.192	-289.267	-289.234	-289.33	-288.997	-289.473	-289.103	-289.384	-289.5	-289.31
750	-289.714	-289.324	-289.714	-289.45	-289.968	-289.225	-289.526	-289.609	-289.574	-289.671	-289.34	-289.819	-289.437	-289.731	-289.848	-289.656
775	-290.063	-289.674	-290.068	-289.791	-290.329	-289.576	-289.867	-289.957	-289.922	-290.02	-289.689	-290.173	-289.777	-290.086	-290.203	-290.009
800	-290.419	-290.031	-290.429	-290.139	-290.697	-289.933	-290.215	-290.313	-290.276	-290.375	-290.046	-290.534	-290.125	-290.448	-290.564	-290.369
	IR Wavenumbers [1/cm]
	3684.84	3634.18	3651.41	3649.83	3660.03	3613.48	3635.96	3641.36	3653.22	3634.84	3646.24	3626.86	3645.76	3642.44	3628.54	3614.19
	3678.72	3618.49	3559.54	3616.46	3628.96	3606.44	3621.74	3622.65	3554.74	3620.28	3636.6	3613.84	3618.9	3622.97	3618.35	3612.6
	P (T)
300	0.036433	7.08795e-09	0.00191903	0.000207878	0.572209	1.24214e-10	0.00330959	0.000897393	0.000498739	0.0117166	1.28822e-08	0.150616	0.000149712	0.00234187	0.219261	0.000440895
400	0.0298552	2.77569e-07	0.00492741	0.00029463	0.632729	1.39204e-08	0.00242175	0.00174395	0.000997569	0.0117789	4.53922e-07	0.12336	0.000223255	0.00613002	0.184107	0.00143028
500	0.0241196	2.34113e-06	0.00824104	0.000313345	0.675649	2.20228e-07	0.00172904	0.00236065	0.00136796	0.0106873	3.53016e-06	0.104141	0.000244628	0.0104232	0.157962	0.0027556
600	0.019598	9.28387e-06	0.011213	0.00029556	0.707299	1.32748e-06	0.00124903	0.00270746	0.00157816	0.00935947	1.3042e-05	0.0899427	0.000235307	0.0143857	0.137986	0.00412691
700	0.0161158	2.41067e-05	0.0136303	0.000264015	0.731641	4.64797e-06	0.000921531	0.00285065	0.00166565	0.00811155	3.17294e-05	0.0790871	0.00021312	0.0177026	0.122357	0.00537953
800	0.01343	4.82718e-05	0.0154945	0.000230017	0.751077	1.16462e-05	0.000695299	0.00286191	0.00167338	0.00702847	5.9762e-05	0.0705533	0.000187595	0.0203364	0.109862	0.0064502
NMR	chemical shift [ppm]
element	Al	Al	Si(Al1-O1)	Si(Al1-O2)	Si(Al1-O3)	Si(Al1-O4)	Si(Al2-O1)	Si(Al2-O2)	Si(Al2-O3)	Si(Al2-O4)	Si	Si
no	59.679	59.6486	-113.576	-114.94	-112.983	-114.7	-113.62	-114.899	-112.904	-114.575	-117.611	-117.707
1-1	63.6493	63.6794	-117.51	-110.514	-108.899	-109.564	-117.712	-110.457	-108.468	-109.34	-113.227	-113.201
1-2	63.8885	73.5863	-112.852	-109.369	-107.651	-107	-109.036	-103.668	-104.046	-109.092	-111.523	-114.024
1-3	65.1254	64.725	-113.61	-110.707	-107.426	-108.39	-111.534	-110.211	-108.817	-109.799	-115.61	-115.845
1-4	63.8702	70.1861	-116.053	-107.576	-110.841	-108.708	-110.465	-109.592	-107.181	-110.215	-114.148	-112.231
2-1	69.9106	63.0983	-108.534	-107.173	-108.49	-111.24	-117.873	-111.079	-108.978	-107.422	-112.358	-114.226
2-2	73.3678	71.5796	-107.017	-108.688	-107.005	-108.364	-107.703	-105.58	-104.619	-106.009	-113.018	-114.208
2-3	70.8592	65.2102	-108.892	-105.619	-107.295	-108.851	-110.365	-107.977	-111.014	-107.463	-113.383	-113.493
2-4	69.4829	69.2433	-108.251	-104.662	-109.62	-109.495	-109.432	-109.493	-106.508	-107.997	-113.889	-113.5
3-1	64.5246	65.0654	-111.669	-110.177	-108.907	-109.713	-113.754	-110.618	-107.523	-108.532	-115.816	-115.67
3-2	65.3046	70.8044	-110.273	-108.121	-111.116	-107.687	-108.861	-105.941	-107.379	-109.103	-113.599	-113.596
3-3	67.5946	67.993	-111.88	-110.079	-111.364	-113.79	-111.767	-109.901	-111.26	-113.815	-116.29	-116.392
3-4	63.2162	70.5154	-110.884	-105.87	-114.698	-110.102	-108.903	-109.923	-105.887	-108.178	-116.181	-114.454
4-1	70.2381	63.845	-110.493	-109.614	-107.026	-110.404	-116.305	-107.5	-110.92	-108.715	-112.158	-114.268
4-2	69.3724	70.1465	-109.86	-109.609	-106.968	-108.68	-108.635	-104.819	-109.765	-109.607	-113.922	-114.234
4-3	70.6337	63.3791	-108.956	-109.75	-105.851	-108.14	-110.771	-105.725	-114.611	-110.121	-114.294	-116.018
4-4	69.0186	69.1207	-109.61	-106.88	-109.406	-109.151	-109.582	-106.883	-109.356	-109.134	-114.593	-114.541
1 OH
2OH
	CQ [MHz]		η
27Al-NMR	Al1	Al2	Al1	Al2
1-1	16.363	16.421	0.292	0.309
1-2	16.511	12.895	0.43	0.24
1-3	17.62	16.788	0.247	0.556
1-4	14.789	16.969	0.095	0.154
2-1	16.206	14.573	0.173	0.301
2-2	15.052	15.509	0.239	0.151
2-3	16.09	13.755	0.225	0.278
2-4	14.762	15.251	0.261	0.189
3-1	16.656	17.396	0.578	0.242
3-2	13.683	16.001	0.286	0.234
3-3	18.28	18.079	0.288	0.301
3-4	13.586	15.609	0.235	0.248
4-1	16.753	14.602	0.182	0.089
4-2	15.355	14.689	0.237	0.161
4-3	15.762	13.436	0.254	0.236
4-4	14.526	14.485	0.233	0.232

## Sheet: 2Al-B
2Al-A
T[K]	G(T) [eV]
	1-1	1-2	1-3	1-4	2-1	2-2	2-3	2-4	3-1	3-2	3-3	3-4	4-1	4-2	4-3	4-4
300	-284.895	-284.884	-284.844	-284.429	-284.674	-284.788	-284.531	-284.727	-284.794	-284.446	-284.431	-284.869	-283.888	-283.679	-283.775	-284.15
325	-285.085	-285.075	-285.033	-284.614	-284.864	-284.982	-284.719	-284.916	-284.975	-284.636	-284.613	-285.052	-284.07	-283.873	-283.961	-284.337
350	-285.286	-285.278	-285.234	-284.81	-285.066	-285.188	-284.919	-285.117	-285.167	-284.839	-284.807	-285.247	-284.263	-284.079	-284.159	-284.535
375	-285.499	-285.492	-285.447	-285.018	-285.279	-285.405	-285.131	-285.329	-285.371	-285.053	-285.012	-285.453	-284.467	-284.297	-284.368	-284.744
400	-285.723	-285.717	-285.67	-285.236	-285.504	-285.634	-285.354	-285.552	-285.585	-285.277	-285.228	-285.671	-284.683	-284.526	-284.588	-284.965
425	-285.958	-285.953	-285.905	-285.466	-285.739	-285.873	-285.587	-285.786	-285.81	-285.513	-285.454	-285.898	-284.908	-284.766	-284.819	-285.196
450	-286.203	-286.199	-286.149	-285.705	-285.984	-286.123	-285.831	-286.03	-286.045	-285.759	-285.691	-286.136	-285.144	-285.017	-285.059	-285.438
475	-286.459	-286.455	-286.404	-285.955	-286.239	-286.383	-286.085	-286.285	-286.29	-286.015	-285.937	-286.384	-285.39	-285.277	-285.31	-285.69
500	-286.724	-286.721	-286.669	-286.214	-286.505	-286.653	-286.348	-286.549	-286.544	-286.281	-286.193	-286.642	-285.645	-285.548	-285.571	-285.951
525	-286.998	-286.997	-286.943	-286.482	-286.779	-286.932	-286.621	-286.823	-286.807	-286.556	-286.458	-286.909	-285.909	-285.828	-285.841	-286.222
550	-287.282	-287.281	-287.226	-286.759	-287.063	-287.221	-286.903	-287.105	-287.08	-286.841	-286.732	-287.185	-286.182	-286.117	-286.12	-286.502
575	-287.574	-287.575	-287.518	-287.046	-287.356	-287.518	-287.195	-287.397	-287.361	-287.134	-287.014	-287.47	-286.464	-286.415	-286.407	-286.791
600	-287.875	-287.877	-287.818	-287.34	-287.657	-287.825	-287.494	-287.697	-287.65	-287.436	-287.305	-287.763	-286.755	-286.722	-286.703	-287.088
625	-288.185	-288.187	-288.127	-287.643	-287.967	-288.14	-287.802	-288.006	-287.948	-287.747	-287.605	-288.064	-287.054	-287.038	-287.008	-287.394
650	-288.502	-288.506	-288.444	-287.955	-288.284	-288.463	-288.119	-288.323	-288.254	-288.065	-287.912	-288.374	-287.36	-287.361	-287.32	-287.708
675	-288.828	-288.832	-288.769	-288.273	-288.61	-288.794	-288.443	-288.647	-288.567	-288.391	-288.227	-288.691	-287.675	-287.693	-287.641	-288.03
700	-289.161	-289.167	-289.102	-288.6	-288.943	-289.132	-288.774	-288.98	-288.888	-288.725	-288.549	-289.016	-287.997	-288.033	-287.969	-288.36
725	-289.502	-289.508	-289.442	-288.934	-289.284	-289.479	-289.114	-289.319	-289.216	-289.067	-288.879	-289.349	-288.326	-288.38	-288.304	-288.697
750	-289.85	-289.857	-289.789	-289.275	-289.632	-289.832	-289.46	-289.666	-289.551	-289.416	-289.216	-289.688	-288.662	-288.734	-288.647	-289.041
775	-290.205	-290.213	-290.144	-289.623	-289.987	-290.193	-289.814	-290.02	-289.894	-289.772	-289.56	-290.035	-289.005	-289.095	-288.996	-289.393
800	-290.567	-290.576	-290.505	-289.978	-290.35	-290.561	-290.174	-290.381	-290.243	-290.134	-289.91	-290.388	-289.355	-289.464	-289.352	-289.751
	IR Wavenumbers [1/cm]
	3669.17	3679.27	3658.51	3643.41	3655.06	3643.14	3625.7	3628.56	3640.76	3608.39	3680.34	3640.68	3642.71	3605.9	3608.24	3639.89
	3658.31	3662.18	3562.35	3596.96	3623.18	3631.53	3612.57	3626.93	3630.34	3596.09	3648.09	3630.26	3619.03	3572.21	3599.02	3598.22
	P (T)
300	0.452687	0.303572	0.0622361	6.73123e-09	8.95257e-05	0.00739819	3.44234e-07	0.000677415	0.0091458	1.28888e-08	7.30293e-09	0.164193	5.56621e-18	1.71163e-21	6.94575e-20	1.41868e-13
400	0.422986	0.351966	0.0907453	3.1039e-07	0.000720345	0.0313708	9.27864e-06	0.00294454	0.00772281	1.02137e-06	2.43469e-07	0.0915328	3.25876e-14	3.50215e-16	2.09211e-15	1.17838e-10
500	0.383603	0.362969	0.106943	2.77376e-06	0.00237519	0.0738725	6.31076e-05	0.00667343	0.00593021	1.33018e-05	1.71024e-06	0.0575526	5.1125e-12	5.37687e-13	9.19571e-13	6.26172e-09
600	0.343436	0.354023	0.113763	1.10377e-05	0.00502802	0.129105	0.000216334	0.0109782	0.00443145	7.04065e-05	5.60863e-06	0.0389321	1.33398e-10	7.0957e-11	4.9211e-11	8.44769e-08
700	0.305685	0.335041	0.114407	2.78473e-05	0.00827694	0.189785	0.000502314	0.0150778	0.00329945	0.000223129	1.20292e-05	0.0276613	1.26111e-09	2.2944e-09	7.9492e-10	5.21751e-07
800	0.271763	0.311936	0.111404	5.31376e-05	0.0116727	0.250306	0.000916693	0.0185531	0.00247301	0.000514446	1.99516e-05	0.020386	6.37107e-09	3.07721e-08	6.10527e-09	1.98283e-06
NMR	chemical shift [ppm]
element	Al	Al	Si(Al1-O1,Al2-O4))	Si(Al1-O3,Al2-O2)	Si(Al1-O2)	Si(Al1-O4)	Si(Al2-O1)	Si(Al2-O3)	Si	Si	Si	Si
no	59.8105	61.2673	-109.689	-108.515	-114.178	-114.196	-112.888	-113.245	-117.809	-120.075	-118.311	-117.987
1-1	63.9203	65.5542	-109.343	-105.246	-111.414	-107.446	-117.14	-110.831	-117.056	-114.177	-116.363	-115.456
1-2	64.1238	70.711	-112.437	-102.878	-110.419	-108.221	-107.293	-110.067	-116.574	-114.779	-114.379	-114.153
1-3	66.0855	68.2218	-111.908	-103.619	-110.458	-109.014	-110.952	-113.744	-117.296	-114.465	-117.862	-116.706
1-4	63.5154	73.1893	-113.216	-105.434	-110.295	-107.98	-104.498	-110.369	-116.066	-115.871	-114.089	-115.88
2-1	70.5944	66.6176	-102.34	-105.389	-107.679	-109.342	-116.866	-109.866	-112.369	-115.207	-116.125	-115.852
2-2	70.2479	71.7054	-104.337	-102.714	-107.084	-109.506	-107.45	-109.22	-112.71	-115.487	-113.788	-114.47
2-3	71.5387	68.8789	-105.884	-105.367	-106.171	-111.52	-111.356	-110.644	-113.973	-115.756	-117.337	-116.454
2-4	72.8625	71.6646	-103.939	-103.683	-106.894	-110.621	-109.758	-108.327	-113.499	-116.745	-114.41	-115.247
3-1	64.6603	67.8271	-105.457	-109.375	-109.343	-109.849	-115.354	-108.911	-116.368	-113.453	-117.243	-116.1
3-2	65.3348	73.7385	-107.297	-108.988	-108.78	-110.497	-108.247	-107.971	-117.767	-113.151	-114.449	-113.989
3-3	67.1472	70.1101	-108.197	-108.168	-108.369	-114.32	-111.573	-109.74	-118.958	-114.337	-118.409	-117.466
3-4	66.1469	70.561	-106.107	-109.469	-108.687	-110.86	-109.546	-108.107	-115.835	-115.947	-115.906	-114.856
4-1	64.7811	65.8967	-105.281	-99.9505	-111.997	-110.308	-114.468	-108.748	-117.09	-115.336	-112.836	-112.504
4-2	65.393	71.1434	-106.607	-101.241	-111.224	-110.43	-106.586	-108.895	-117.032	-115.03	-110.017	-109.113
4-3	66.5358	68.1746	-107.077	-100.338	-110.713	-112.828	-110.748	-108.031	-117.687	-116.941	-113.981	-112.495
4-4	66.9226	67.5545	-105.304	-100.434	-112.166	-110.272	-107.919	-108.846	-115.863	-117.234	-110.409	-109.919
1 OH
2OH
	CQ [MHz]		η
27Al-NMR	Al1	Al2	Al1	Al2
1-1	15.937	15.168	0.166	0.368
1-2	15.241	13.573	0.468	0.232
1-3	15.125	16.769	0.154	0.28
1-4	19.3	17.528	0.183	0.195
2-1	15.557	17.18	0.248	0.283
2-2	13.655	14.27	0.543	0.329
2-3	15.456	18.61	0.261	0.117
2-4	14.213	13.609	0.283	0.202
3-1	16.363	15.349	0.093	0.37
3-2	19.697	18.264	0.162	0.343
3-3	16.885	18.077	0.094	0.265
3-4	15.089	11.823	0.501	0.223
4-1	5.268	16.759	0.355	0.278
4-2	8.057	17.398	0.333	0.459
4-3	5.51	17.837	0.311	0.357
4-4	-5.413	11.201	0.863	0.086

## Sheet: 2Al-C
2Al-A
T[K]	G(T) [eV]
	1-1	1-2	1-3	1-4	2-1	2-2	2-3	2-4	3-1	3-2	3-3	3-4	4-1	4-2	4-3	4-4
300	-284.774	-284.835	-284.727	-284.788	-284.844	-284.697	-284.63	-284.573	-284.728	-284.632	-284.79	-284.716	-284.513	-284.631	-284.684	-284.506
325	-284.963	-285.024	-284.911	-284.973	-285.033	-284.886	-284.815	-284.763	-284.912	-284.817	-284.979	-284.906	-284.703	-284.824	-284.87	-284.696
350	-285.164	-285.224	-285.107	-285.169	-285.234	-285.087	-285.012	-284.964	-285.108	-285.014	-285.179	-285.107	-284.904	-285.029	-285.067	-284.897
375	-285.377	-285.436	-285.314	-285.377	-285.446	-285.3	-285.22	-285.177	-285.315	-285.222	-285.391	-285.32	-285.117	-285.246	-285.276	-285.11
400	-285.601	-285.659	-285.532	-285.595	-285.669	-285.524	-285.439	-285.401	-285.533	-285.442	-285.614	-285.544	-285.341	-285.474	-285.496	-285.334
425	-285.835	-285.892	-285.761	-285.825	-285.903	-285.758	-285.668	-285.635	-285.761	-285.672	-285.848	-285.779	-285.576	-285.713	-285.726	-285.568
450	-286.08	-286.136	-286	-286.064	-286.147	-286.003	-285.908	-285.88	-286	-285.912	-286.092	-286.024	-285.821	-285.963	-285.966	-285.813
475	-286.335	-286.39	-286.249	-286.313	-286.402	-286.258	-286.158	-286.135	-286.249	-286.162	-286.346	-286.279	-286.076	-286.223	-286.217	-286.068
500	-286.599	-286.653	-286.507	-286.572	-286.666	-286.523	-286.417	-286.4	-286.507	-286.421	-286.61	-286.544	-286.341	-286.492	-286.477	-286.333
525	-286.874	-286.926	-286.775	-286.841	-286.939	-286.797	-286.686	-286.674	-286.775	-286.69	-286.883	-286.818	-286.616	-286.771	-286.746	-286.607
550	-287.157	-287.209	-287.052	-287.118	-287.222	-287.08	-286.964	-286.958	-287.052	-286.969	-287.165	-287.102	-286.899	-287.059	-287.025	-286.891
575	-287.449	-287.5	-287.338	-287.404	-287.513	-287.372	-287.25	-287.25	-287.338	-287.255	-287.457	-287.394	-287.192	-287.357	-287.312	-287.183
600	-287.75	-287.799	-287.632	-287.699	-287.814	-287.673	-287.545	-287.551	-287.632	-287.551	-287.757	-287.695	-287.493	-287.662	-287.607	-287.484
625	-288.059	-288.108	-287.935	-288.002	-288.122	-287.982	-287.848	-287.86	-287.934	-287.854	-288.065	-288.004	-287.802	-287.977	-287.912	-287.793
650	-288.376	-288.424	-288.246	-288.313	-288.439	-288.299	-288.16	-288.177	-288.245	-288.166	-288.381	-288.321	-288.119	-288.3	-288.224	-288.11
675	-288.701	-288.748	-288.564	-288.631	-288.763	-288.624	-288.479	-288.503	-288.563	-288.485	-288.706	-288.647	-288.445	-288.63	-288.543	-288.435
700	-289.034	-289.079	-288.89	-288.958	-289.096	-288.957	-288.806	-288.836	-288.889	-288.812	-289.038	-288.98	-288.778	-288.968	-288.871	-288.768
725	-289.374	-289.419	-289.224	-289.292	-289.435	-289.297	-289.14	-289.176	-289.222	-289.147	-289.377	-289.32	-289.119	-289.314	-289.206	-289.109
750	-289.722	-289.765	-289.564	-289.633	-289.782	-289.644	-289.481	-289.524	-289.562	-289.489	-289.724	-289.668	-289.466	-289.668	-289.548	-289.456
775	-290.077	-290.119	-289.912	-289.981	-290.136	-289.999	-289.829	-289.878	-289.91	-289.837	-290.078	-290.023	-289.821	-290.028	-289.897	-289.811
800	-290.438	-290.479	-290.266	-290.335	-290.497	-290.36	-290.184	-290.24	-290.264	-290.193	-290.438	-290.384	-290.183	-290.395	-290.253	-290.173
	IR Wavenumbers [1/cm]
	3664.18	3662.1	3657.37	3671.84	3662.69	3649.02	3648.88	3646.26	3659.07	3645.29	3580.79	3647.21	3640.56	3627.82	3652.08	3641.28
	3662.55	3635.71	3628.26	3636.24	3634.97	3645.46	3622.24	3626.59	3622.31	3625.36	3576.67	3643.45	3616.63	3611.04	3637.17	3615.89
	P (T)
300	0.0321679	0.348607	0.00516603	0.0566478	0.484514	0.00163199	0.000121823	1.37347e-05	0.00540604	0.000131011	0.0609918	0.0034763	1.33273e-06	0.00012683	0.000996226	1.02615e-06
400	0.060051	0.322989	0.00821495	0.0516661	0.436329	0.00647667	0.000546232	0.00018235	0.00836137	0.000597725	0.0884734	0.011662	3.23217e-05	0.00154494	0.00284683	2.60459e-05
500	0.0846823	0.296376	0.00999869	0.0450001	0.393738	0.0142262	0.00122946	0.000829771	0.0099896	0.00136015	0.107023	0.023264	0.000211178	0.00699088	0.0049056	0.000174741
600	0.103453	0.270665	0.0107032	0.0385357	0.355694	0.0232552	0.00197524	0.00220932	0.0105516	0.00220176	0.117968	0.035726	0.000715323	0.0191389	0.00660661	0.000602175
700	0.116196	0.246372	0.0106773	0.0327827	0.32133	0.0320919	0.00262772	0.00432603	0.0104205	0.00294534	0.123096	0.0471854	0.00166275	0.0391141	0.0077556	0.00141669
800	0.12369	0.223708	0.0102121	0.0278286	0.290161	0.0398208	0.00311483	0.00698507	0.00988846	0.00350618	0.124001	0.0566749	0.00305238	0.0663588	0.00837461	0.00262382
NMR	chemical shift [ppm]
element	Al	Al	Si(Al1-O1)	Si(Al1-O2)	Si(Al1-O3)	Si(Al1-O4)	Si(Al2-O1)	Si(Al2-O2)	Si(Al2-O3)	Si(Al2-O4)	Si	Si
no	60.892	60.9106	-114.589	-114.036	-113.033	-116.148	-111.979	-114.556	-113.057	-116.219	-117.905	-117.93
1-1	64.731	65.1684	-117.404	-110.327	-110.84	-109.883	-117.132	-110.176	-110.608	-109.948	-116.043	-116.143
1-2	65.0952	72.7152	-116.127	-110.921	-109.722	-110.448	-107.664	-107.079	-110.404	-110.874	-115.385	-113.433
1-3	63.6898	66.6659	-116.01	-110.764	-111.801	-108.952	-111.722	-109.604	-114.258	-112.818	-114.48	-116.875
1-4	63.4265	71.5636	-118.769	-110.95	-110.232	-108.217	-109.577	-109.697	-109.305	-110.704	-116.05	-115.189
2-1	72.1373	65.4571	-107.547	-107.407	-110.499	-110.925	-116.054	-110.596	-109.229	-110.659	-113.773	-115.636
2-2	72.0741	72.8197	-107.51	-107.601	-109.477	-111.933	-107.554	-107.284	-109.258	-111.957	-112.357	-112.424
2-3	70.7016	67.4266	-107.534	-108.949	-110.711	-109.906	-111.577	-108.967	-111.981	-113.493	-112.353	-116.054
2-4	71.9991	72.3612	-109.162	-106.922	-109.914	-108.58	-108.9	-110.111	-108.599	-110.096	-112.726	-114.616
3-1	66.8583	63.7648	-111.562	-109.798	-113.904	-112.951	-116.087	-110.506	-111.667	-108.878	-117.084	-114.54
3-2	67.5551	70.828	-111.374	-109.196	-111.851	-113.628	-107.378	-109.235	-110.601	-109.783	-116.312	-112.005
3-3	64.2184	64.2388	-111.9	-108.018	-115.069	-111.236	-111.968	-108.012	-115.241	-110.967	-115.926	-115.725
3-4	67.3886	69.1891	-112.649	-109.986	-112.115	-110.749	-109.862	-110.557	-109.55	-109.948	-117.563	-113.417
4-1	70.1948	71.0895	-108.445	-111.46	-109.678	-108.347	-110.651	-109.239	-109.457	-111.742	-114.686	-115.207
4-2	71.8428	72.2821	-105.438	-111.797	-109.871	-108.205	-109.077	-105.993	-110.352	-111.952	-114.099	-112.589
4-3	69.2688	66.3736	-107.03	-111.654	-110.185	-108.788	-112.541	-109.028	-114.159	-112.756	-113.494	-117.132
4-4	71.0514	70.1457	-110.704	-109.419	-109.556	-112.061	-108.271	-111.363	-109.925	-108.247	-115.308	-114.528
1 OH
2OH
	CQ [MHz]		η
27Al-NMR	Al1	Al2	Al1	Al2
1-1	17.151	17.066	0.25	0.273
1-2	14.345	15.509	0.337	0.321
1-3	17.715	16.698	0.181	0.26
1-4	13.74	15.321	0.216	0.189
2-1	15.617	14.348	0.301	0.344
2-2	14.169	14.158	0.287	0.315
2-3	17.918	14.965	0.12	0.337
2-4	15.223	15.282	0.118	0.218
3-1	16.737	17.741	0.25	0.188
3-2	15.015	17.959	0.34	0.111
3-3	16.953	16.961	0.241	0.25
3-4	13.489	16.664	0.183	0.073
4-1	15.123	15.267	0.136	0.177
4-2	15.038	15.401	0.181	0.203
4-3	16.658	13.53	0.048	0.288
4-4	15.253	15.171	0.162	0.15

## Sheet: 2Al-D
2Al-A
T[K]	G(T) [eV]
	1-1	1-2	1-3	1-4	2-1	2-2	2-3	2-4	3-1	3-2	3-3	3-4	4-1	4-2	4-3	4-4
300	-284.923	-284.42	-284.637	-284.845	-284.778	-284.862	-284.731	-284.406	-284.376	-284.889	-284.645	-284.787	-284.629	-284.731	-284.414	-284.577
325	-285.113	-284.612	-284.823	-285.03	-284.968	-285.054	-284.921	-284.599	-284.56	-285.078	-284.83	-284.972	-284.819	-284.925	-284.603	-284.765
350	-285.315	-284.817	-285.02	-285.226	-285.169	-285.258	-285.123	-284.803	-284.756	-285.28	-285.026	-285.168	-285.022	-285.131	-284.805	-284.964
375	-285.528	-285.033	-285.228	-285.434	-285.381	-285.473	-285.335	-285.019	-284.964	-285.492	-285.233	-285.376	-285.236	-285.348	-285.018	-285.176
400	-285.752	-285.26	-285.447	-285.653	-285.604	-285.7	-285.559	-285.247	-285.182	-285.716	-285.451	-285.594	-285.461	-285.576	-285.242	-285.398
425	-285.988	-285.498	-285.677	-285.882	-285.839	-285.937	-285.794	-285.485	-285.411	-285.95	-285.68	-285.823	-285.696	-285.816	-285.476	-285.631
450	-286.233	-285.747	-285.917	-286.121	-286.083	-286.185	-286.039	-285.733	-285.65	-286.195	-285.919	-286.063	-285.942	-286.066	-285.721	-285.874
475	-286.489	-286.006	-286.167	-286.371	-286.338	-286.443	-286.294	-285.992	-285.9	-286.45	-286.168	-286.312	-286.199	-286.326	-285.976	-286.127
500	-286.754	-286.275	-286.426	-286.63	-286.602	-286.711	-286.559	-286.261	-286.158	-286.715	-286.426	-286.571	-286.465	-286.595	-286.241	-286.39
525	-287.029	-286.553	-286.695	-286.898	-286.876	-286.988	-286.834	-286.539	-286.426	-286.989	-286.694	-286.839	-286.74	-286.875	-286.516	-286.663
550	-287.313	-286.841	-286.973	-287.176	-287.159	-287.275	-287.117	-286.827	-286.704	-287.272	-286.971	-287.116	-287.025	-287.163	-286.799	-286.944
575	-287.606	-287.137	-287.26	-287.462	-287.451	-287.571	-287.41	-287.123	-286.99	-287.564	-287.257	-287.402	-287.318	-287.461	-287.091	-287.235
600	-287.907	-287.442	-287.556	-287.757	-287.751	-287.875	-287.711	-287.428	-287.284	-287.864	-287.551	-287.697	-287.62	-287.767	-287.392	-287.534
625	-288.217	-287.756	-287.859	-288.06	-288.06	-288.188	-288.02	-287.742	-287.587	-288.173	-287.854	-288	-287.931	-288.082	-287.702	-287.841
650	-288.535	-288.078	-288.171	-288.371	-288.377	-288.509	-288.338	-288.064	-287.898	-288.491	-288.164	-288.311	-288.249	-288.405	-288.019	-288.157
675	-288.861	-288.408	-288.49	-288.69	-288.702	-288.838	-288.663	-288.394	-288.216	-288.816	-288.483	-288.629	-288.576	-288.736	-288.345	-288.481
700	-289.194	-288.746	-288.817	-289.017	-289.034	-289.175	-288.996	-288.732	-288.543	-289.148	-288.809	-288.955	-288.91	-289.075	-288.678	-288.812
725	-289.535	-289.091	-289.152	-289.351	-289.374	-289.519	-289.337	-289.077	-288.876	-289.488	-289.142	-289.289	-289.251	-289.421	-289.018	-289.151
750	-289.883	-289.444	-289.493	-289.692	-289.721	-289.871	-289.684	-289.429	-289.217	-289.836	-289.483	-289.63	-289.6	-289.775	-289.366	-289.497
775	-290.239	-289.803	-289.842	-290.04	-290.076	-290.229	-290.039	-289.789	-289.565	-290.19	-289.83	-289.978	-289.956	-290.135	-289.721	-289.85
800	-290.601	-290.17	-290.197	-290.395	-290.437	-290.595	-290.401	-290.156	-289.919	-290.552	-290.185	-290.332	-290.319	-290.503	-290.083	-290.21
	IR Wavenumbers [1/cm]
	3686.4	3626.61	3659.32	3664.62	3686.53	3635.96	3656.68	3618.45	3615.81	3648.23	3632.02	3647.48	3679.84	3638.43	3649.47	3634.06
	3664.83	3582.67	3629.26	3656.71	3637.25	3633.46	3629.33	3598.59	3584.43	3641.37	3595.08	3605.03	3635.22	3631.77	3612.63	3629.47
	P (T)
300	0.700983	2.48458e-09	1.12962e-05	0.0348	0.00264377	0.0674826	0.000426962	1.48172e-09	4.51721e-10	0.189558	1.53453e-05	0.00364196	8.02105e-06	0.000428296	1.98151e-09	1.08927e-06
400	0.604349	3.81057e-07	8.59492e-05	0.0334966	0.00825611	0.131546	0.00224207	2.56771e-07	3.9489e-08	0.209975	9.6815e-05	0.00613405	0.000127294	0.00366966	2.2155e-07	2.05151e-05
500	0.524213	7.75375e-06	0.000261716	0.0294693	0.015428	0.193366	0.00572885	5.62618e-06	5.18838e-07	0.209847	0.000261881	0.00746861	0.000634904	0.0131906	3.5576e-06	0.000112648
600	0.455465	5.70682e-05	0.000507759	0.0249929	0.0223214	0.24583	0.010215	4.35368e-05	2.66627e-06	0.199627	0.00046827	0.00782041	0.0017729	0.0305206	2.16427e-05	0.000334595
700	0.396135	0.000233982	0.000765204	0.0208652	0.0279261	0.286875	0.01484	0.00018511	8.05755e-06	0.184901	0.00066487	0.00756425	0.00355349	0.054707	7.56315e-05	0.000700264
800	0.345214	0.00066454	0.000989122	0.0173248	0.0319571	0.317059	0.0189982	0.000540468	1.75545e-05	0.168762	0.00082129	0.00699978	0.00579606	0.0834903	0.000187152	0.00117941
NMR	chemical shift [ppm]
element	Al	Al	Si(Al1-O1,Al2-O2)	Si(Al1-O3.Al2-O1)	Si(Al1-O2,Al2-O4)	Si(Al1-O4)	Si(Al2-O3)	Si	Si	Si	Si	Si
no	61.5324	61.9054	-109.317	-108.304	-110.459	-115.085	-112.063	-118.128	-119.304	-119.071	-117.81	-118.823
1-1	62.0792	64.9292	-114.568	-110.877	-106.08	-109.609	-108.464	-114.04	-115.146	-116.335	-114.391	-115.677
1-2	67.3071	72.4514	-104.537	-102.496	-105.823	-109.33	-109	-113.848	-115.286	-117.008	-115.083	-114.29
1-3	66.3902	66.4043	-108.364	-106.386	-106.109	-108.788	-112.64	-112.907	-116.425	-116.343	-115.649	-114.909
1-4	63.3561	69.5411	-111.417	-104.259	-105.806	-110.006	-106.938	-115.886	-115.607	-115	-115.673	-114.347
2-1	70.5595	64.0888	-103.205	-110.641	-102.48	-111.553	-108.967	-114.245	-116.383	-114.068	-113.372	-114.826
2-2	72.7762	71.7492	-100.7	-102.721	-101.464	-111.214	-109.261	-113.998	-117.015	-114.206	-113.582	-113.945
2-3	69.0595	67.2256	-102.7	-105.343	-105.243	-110.604	-113.186	-114.052	-116.941	-113.156	-114.83	-115.181
2-4	71.0666	72.5106	-102.792	-103.926	-103.485	-110.79	-107.724	-115.89	-116.695	-112.315	-114.691	-114.36
3-1	67.1439	68.2252	-107.893	-109.263	-103.947	-113.227	-111.172	-114.334	-114.501	-118.27	-112.124	-115.063
3-2	67.1819	70.5134	-103.367	-108.777	-103.034	-112.413	-109.049	-113.511	-116.142	-115.608	-112.75	-112.469
3-3	65.7835	66.5156	-104.65	-110.37	-103.825	-110.945	-113.633	-112.448	-113.402	-116.827	-114.078	-116.111
3-4	67.1642	70.0843	-104.559	-107.942	-102.979	-112.94	-109.829	-116.015	-116.01	-113.671	-113.01	-113.471
4-1	70.6509	64.1397	-104.034	-112.749	-105.177	-109.672	-109.005	-114.325	-113.25	-114.2	-114.195	-116.436
4-2	71.7862	71.5614	-103.922	-102.511	-104.602	-110.095	-109.363	-114.02	-113.382	-114.933	-114.548	-115.421
4-3	70.4608	67.3345	-103.37	-106.173	-105.468	-108.196	-113.454	-114.604	-112.61	-113.412	-115.623	-116.904
4-4	69.038	71.8273	-103.536	-104.741	-104.668	-110.454	-108.23	-116.035	-114.056	-112.016	-115.742	-116.055
1 OH
2OH
	CQ [MHz]		η
27Al-NMR	Al1	Al2	Al1	Al2
1-1	14.23	15.543	0.65	0.189
1-2	20.303	17.875	0.255	0.274
1-3	16.193	17.369	0.309	0.299
1-4	14.896	13.288	0.132	0.275
2-1	13.635	15.751	0.663	0.476
2-2	13.451	13.137	0.229	0.418
2-3	14.117	16.643	0.4	0.285
2-4	17.907	18.045	0.301	0.066
3-1	20.301	20.364	0.093	0.222
3-2	15.463	12.99	0.452	0.383
3-3	16.946	17.456	0.137	0.427
3-4	15.48	12.893	0.367	0.433
4-1	14.418	16.558	0.203	0.311
4-2	14.19	14.2	0.575	0.43
4-3	15.655	18.42	0.112	0.029
4-4	14.399	14.541	0.388	0.085

## Sheet: 2Al-E
2Al-A
T[K]	G(T) [eV]
	1-1	1-2	1-3	1-4	2-1	2-2	2-3	2-4	3-1	3-2	3-3	3-4	4-1	4-2	4-3	4-4
300	-284.814	-284.801	-284.891	-284.827	-284.838	-284.808	-284.741	-284.907	-284.866	-284.854	-285.079	-284.35	-284.865	-284.822	-284.35	-285.084
325	-285.009	-284.99	-285.08	-285.015	-285.033	-284.992	-284.929	-285.103	-285.051	-285.044	-285.264	-284.532	-285.058	-285.007	-284.532	-285.278
350	-285.216	-285.191	-285.281	-285.216	-285.239	-285.188	-285.129	-285.31	-285.247	-285.245	-285.461	-284.725	-285.264	-285.203	-284.725	-285.484
375	-285.435	-285.403	-285.493	-285.428	-285.458	-285.395	-285.34	-285.53	-285.455	-285.458	-285.669	-284.929	-285.482	-285.411	-284.929	-285.702
400	-285.665	-285.627	-285.717	-285.651	-285.687	-285.613	-285.562	-285.76	-285.673	-285.682	-285.888	-285.144	-285.71	-285.63	-285.143	-285.931
425	-285.906	-285.861	-285.951	-285.884	-285.927	-285.841	-285.795	-286.002	-285.903	-285.917	-286.118	-285.369	-285.95	-285.859	-285.369	-286.171
450	-286.157	-286.106	-286.196	-286.128	-286.178	-286.08	-286.039	-286.254	-286.142	-286.162	-286.357	-285.605	-286.2	-286.098	-285.604	-286.421
475	-286.418	-286.361	-286.45	-286.382	-286.439	-286.328	-286.292	-286.516	-286.392	-286.418	-286.607	-285.85	-286.46	-286.348	-285.849	-286.681
500	-286.69	-286.625	-286.715	-286.646	-286.709	-286.587	-286.556	-286.787	-286.651	-286.683	-286.866	-286.105	-286.73	-286.607	-286.104	-286.952
525	-286.971	-286.899	-286.989	-286.92	-286.99	-286.854	-286.828	-287.069	-286.919	-286.957	-287.135	-286.369	-287.009	-286.875	-286.368	-287.231
550	-287.261	-287.182	-287.272	-287.202	-287.279	-287.131	-287.11	-287.36	-287.197	-287.241	-287.413	-286.642	-287.298	-287.153	-286.641	-287.52
575	-287.56	-287.474	-287.563	-287.493	-287.578	-287.416	-287.401	-287.659	-287.483	-287.533	-287.699	-286.924	-287.596	-287.439	-286.923	-287.818
600	-287.868	-287.774	-287.864	-287.793	-287.885	-287.71	-287.7	-287.968	-287.778	-287.834	-287.994	-287.214	-287.903	-287.734	-287.213	-288.125
625	-288.184	-288.083	-288.173	-288.102	-288.201	-288.012	-288.008	-288.285	-288.081	-288.144	-288.298	-287.512	-288.218	-288.037	-287.511	-288.44
650	-288.509	-288.4	-288.49	-288.418	-288.524	-288.322	-288.324	-288.61	-288.392	-288.461	-288.609	-287.818	-288.541	-288.348	-287.817	-288.764
675	-288.842	-288.725	-288.815	-288.743	-288.856	-288.64	-288.647	-288.943	-288.711	-288.787	-288.928	-288.132	-288.872	-288.667	-288.131	-289.095
700	-289.182	-289.058	-289.147	-289.075	-289.196	-288.966	-288.979	-289.283	-289.037	-289.12	-289.255	-288.454	-289.211	-288.993	-288.453	-289.434
725	-289.53	-289.398	-289.487	-289.414	-289.543	-289.299	-289.317	-289.632	-289.371	-289.461	-289.589	-288.783	-289.557	-289.327	-288.781	-289.781
750	-289.885	-289.745	-289.834	-289.761	-289.898	-289.639	-289.664	-289.987	-289.712	-289.809	-289.93	-289.119	-289.911	-289.668	-289.117	-290.135
775	-290.247	-290.099	-290.189	-290.115	-290.259	-289.986	-290.017	-290.35	-290.06	-290.164	-290.279	-289.462	-290.272	-290.016	-289.46	-290.496
800	-290.617	-290.461	-290.55	-290.475	-290.628	-290.34	-290.377	-290.72	-290.415	-290.525	-290.634	-289.811	-290.64	-290.371	-289.81	-290.864
	IR Wavenumbers [1/cm]
	3677.17	3655.46	3661.95	3647.55	3654.08	3647.86	3637.83	3645.34	3662.3	3647.13	3627.63	3633.09	3649.22	3646.41	3634	3650.5
	3672.85	3635.61	3642.03	3627.14	3634.5	3636.25	3634.17	3613.06	3646.2	3636.56	3627.51	3600.33	3628.29	3611.02	3602.13	3649.07
	P (T)
300	1.59593e-05	9.44034e-06	0.000308922	2.57277e-05	4.04003e-05	1.26742e-05	9.26452e-07	0.00056835	0.000117322	7.31134e-05	0.451995	2.55567e-13	0.000111208	2.11117e-05	2.548e-13	0.5467
400	0.000340614	0.000113625	0.00154313	0.000225378	0.000646037	7.52276e-05	1.73939e-05	0.00541631	0.000436434	0.000566084	0.220716	9.27796e-11	0.00126766	0.000122463	9.18529e-11	0.768513
500	0.00194452	0.00043237	0.00347486	0.000710067	0.00306783	0.000177846	8.62731e-05	0.0187847	0.000784412	0.00165303	0.11714	2.47282e-09	0.00492455	0.000284824	2.43803e-09	0.846535
600	0.00590517	0.000963204	0.00546106	0.00139604	0.0081943	0.000278677	0.000229311	0.0406169	0.00102669	0.0030856	0.0679296	1.88783e-08	0.0115204	0.000441089	1.85624e-08	0.852952
700	0.012582	0.00160081	0.00707551	0.00212315	0.0158814	0.00035148	0.000432441	0.0676243	0.00114025	0.0045182	0.042157	7.2121e-08	0.0203255	0.000551506	7.07797e-08	0.823636
800	0.0215485	0.00223093	0.00818093	0.00276919	0.0252887	0.000391028	0.000662753	0.0960323	0.00115397	0.00572488	0.0275661	1.81066e-07	0.0301772	0.000609522	1.7745e-07	0.777664
NMR	chemical shift [ppm]
element	Al	Al	Si(Al1-O3,Al2-O4))	Si(Al1-O4,Al2-O3)	Si(Al1-O1)	Si(Al1-O2)	Si(Al2-O1)	Si(Al2-O2)	Si	Si	Si	Si
no	59.0068	58.9302	-109.087	-108.995	-113.948	-113.273	-113.878	-113.419	-118.098	-118.216	-119.461	-119.441
1-1	64.5354	64.5103	-104.08	-104.058	-117.941	-108.244	-117.958	-108.197	-115.239	-115.191	-115.755	-115.796
1-2	63.7563	70.2107	-105.093	-104.065	-116.735	-108.845	-109.409	-104.426	-115.249	-110.965	-116.226	-114.578
1-3	62.926	63.3243	-105.861	-108.997	-116.981	-108.976	-112.343	-107.11	-114.639	-114.812	-114.224	-116.941
1-4	62.7839	68.8995	-106.128	-103.746	-117.24	-110.299	-110.654	-107.734	-117.258	-114.802	-114.104	-115.204
2-1	70.1137	63.7708	-104.117	-105.156	-109.427	-104.365	-116.746	-108.854	-110.806	-115.235	-114.556	-116.141
2-2	68.111	64.3874	-105.522	-109.221	-107.644	-107.628	-111.056	-107.4	-110.575	-114.024	-114.064	-117.493
2-3	69.6042	69.6244	-104.825	-104.843	-108.24	-106.309	-108.221	-106.226	-111.032	-111.06	-114.963	-114.971
2-4	69.3455	68.5629	-104.442	-104.464	-109.065	-106.4	-108.589	-108.921	-113.63	-114.124	-113.285	-116.078
3-1	63.3818	62.9386	-109.028	-105.884	-112.137	-107.152	-116.932	-108.959	-114.661	-114.61	-116.854	-114.359
3-2	64.4069	68.1412	-109.339	-105.654	-110.97	-107.503	-107.57	-107.779	-114.127	-110.676	-117.517	-114.185
3-3	62.6898	62.7098	-110.325	-110.29	-111.041	-109.202	-111.033	-109.242	-115.57	-115.587	-115.619	-115.577
3-4	69.2539	69.2212	-101.612	-106.472	-111.193	-109.928	-106.669	-111.761	-118.854	-114.195	-116.866	-116.176
4-1	68.8952	62.6554	-103.84	-106.177	-110.513	-107.825	-117.191	-110.121	-114.894	-117.187	-115.186	-114.316
4-2	68.6321	70.0899	-105.036	-103.732	-106.33	-110.389	-108.749	-106.767	-113.403	-113.761	-116.644	-116.013
4-3	69.1161	69.0414	-106.22	-101.601	-106.854	-111.522	-111.423	-109.741	-114.406	-118.722	-115.871	-116.57
4-4	67.3312	67.2697	-104.783	-104.751	-110.154	-109.026	-110.195	-109.079	-115.419	-115.475	-113.775	-113.745
1 OH
2OH
	CQ [MHz]		η
27Al-NMR	Al1	Al2	Al1	Al2
1-1	17.155	17.147	0.115	0.115
1-2	16.791	15.185	0.11	0.216
1-3	16.233	16.266	0.218	0.215
1-4	16.302	13.86	0.423	0.229
2-1	15.186	16.787	0.22	0.107
2-2	14.372	16.869	0.092	0.18
2-3	15.649	15.65	0.294	0.293
2-4	14.742	13.637	0.622	0.271
3-1	16.258	16.232	0.214	0.218
3-2	16.838	14.366	0.179	0.087
3-3	14.938	14.969	0.08	0.08
3-4	21.062	16.883	0.2	0.307
4-1	13.875	16.323	0.234	0.421
4-2	13.432	14.551	0.307	0.606
4-3	16.909	21.048	0.303	0.206
4-4	12.161	12.145	0.222	0.22

## Sheet: defect
Volume:	810 Å^3
1Al
T[K]	G(T) [eV]
	d4	d3-1	d3-2	d3-3	d3-4
300	-285.639	-285.658	-285.675	-285.156	-285.099
325	-285.822	-285.84	-285.862	-285.342	-285.284
350	-286.016	-286.034	-286.061	-285.541	-285.48
375	-286.222	-286.239	-286.271	-285.751	-285.687
400	-286.438	-286.454	-286.492	-285.972	-285.906
425	-286.666	-286.681	-286.724	-286.203	-286.135
450	-286.903	-286.917	-286.967	-286.445	-286.374
475	-287.151	-287.163	-287.219	-286.698	-286.624
500	-287.408	-287.419	-287.481	-286.96	-286.883
525	-287.674	-287.684	-287.753	-287.231	-287.152
550	-287.95	-287.958	-288.034	-287.512	-287.43
575	-288.234	-288.24	-288.324	-287.801	-287.717
600	-288.527	-288.531	-288.622	-288.099	-288.012
625	-288.828	-288.831	-288.929	-288.406	-288.316
650	-289.138	-289.138	-289.244	-288.721	-288.628
675	-289.455	-289.453	-289.567	-289.043	-288.948
700	-289.78	-289.776	-289.898	-289.374	-289.276
725	-290.112	-290.106	-290.236	-289.712	-289.612
750	-290.451	-290.443	-290.582	-290.057	-289.954
775	-290.798	-290.788	-290.934	-290.41	-290.304
800	-291.152	-291.14	-291.295	-290.77	-290.662
	IR Wavenumbers [1/cm]
	3601.05	3756.44	3745.38	3745.21	3670.04
	3567.86	3544.41	3481.07	3561.95	3575.92
	3546.54	3452.03	3376.84	3442.01	3328.93
	3021.86	3135.26	3204.52	3198.57	3237.37
	P (T)
300	0.139497	0.297313	0.56319	9.42481e-10	1.06349e-10
400	0.137802	0.233032	0.629167	6.42194e-08	8.97992e-09
500	0.13054	0.176189	0.693269	2.03631e-06	3.35677e-07
600	0.121602	0.137474	0.740901	1.94954e-05	3.55727e-06
700	0.11269	0.109955	0.777241	9.57762e-05	1.87163e-05
800	0.104396	0.0897412	0.805486	0.000312259	6.41059e-05
NMR	chemical shift [ppm]
element	Si(O1)	Si(O2)	Si(O3)	Si(O4)	Si	Si	Si	Si	Si	Si	Si	Si
Si-SSZ13	-114.926	-114.958	-114.932	-114.83	-114.978	-115.017	-114.822	-114.956	-115.007	-114.934	-115.022	-114.963
d4	-106.802	-101.794	-114.165	-105.127	-114.951	-116.264	-117.154	-117.638	-114.069	-116.578	-116.379
d3-1	-103.49	-101.884	-106.674	-106.274	-109.823	-115.57	-116.054	-115.363	-115.967	-120.636	-116.143
d3-2	-107.429	-105.682	-99.2628	-100.867	-110.106	-116.127	-117.312	-109.768	-113.088	-115.363	-117.196
d3-3	-105.177	-86.8581	-104.434	-99.9952	-113.603	-112.92	-109.245	-111.332	-117.028	-113.721	-106.877
d3-4	-106.375	-101.04	-107.339	-87.2077	-115.135	-115.176	-104.217	-115.421	-114.401	-107.925	-107.667
OH-to-center
Volume:	830 Å^3
1Al
T[K]	G(T) [eV]
	d4	d3-1	d3-2	d3-3	d3-4
300	-285.751	-285.677	-285.636	-285.152	-285.342
325	-285.943	-285.863	-285.823	-285.339	-285.543
350	-286.147	-286.061	-286.022	-285.537	-285.756
375	-286.363	-286.27	-286.232	-285.747	-285.98
400	-286.59	-286.49	-286.453	-285.968	-286.214
425	-286.828	-286.72	-286.685	-286.2	-286.46
450	-287.076	-286.961	-286.927	-286.442	-286.715
475	-287.335	-287.213	-287.18	-286.694	-286.98
500	-287.604	-287.473	-287.442	-286.956	-287.255
525	-287.882	-287.743	-287.714	-287.227	-287.152
550	-288.169	-288.023	-287.995	-287.508	-287.43
575	-288.466	-288.311	-288.285	-287.797	-287.717
600	-288.771	-288.608	-288.583	-288.096	-288.013
625	-289.085	-288.913	-288.89	-288.402	-288.317
650	-289.407	-289.226	-289.205	-288.717	-288.629
675	-289.738	-289.547	-289.528	-289.04	-288.949
700	-290.076	-289.876	-289.859	-289.37	-289.276
725	-290.421	-290.212	-290.197	-289.708	-289.612
750	-290.774	-290.555	-290.542	-290.053	-289.954
775	-291.135	-290.906	-290.895	-290.406	-290.304
800	-291.503	-291.265	-291.256	-290.766	-290.662
	IR Wavenumbers [1/cm]
	3627.66	3753.2	3742.3	3741.33	3670.33
	3597.72	3569.22	3567.94	3592.9	3646.59
	3566.58	3541.61	3463.29	3394.51	3366.12
	3082.91	3149.67	3212.08	3214.35	3264.21
	P (T)
300	0.935648	0.0535841	0.0107674	7.99749e-11	1.27697e-07
400	0.931669	0.0508094	0.0175043	1.34968e-08	1.72169e-05
500	0.932612	0.0451631	0.021937	2.74744e-07	0.000287677
600	0.936151	0.0393692	0.0244771	1.96896e-06	3.95823e-07
700	0.9401	0.034164	0.0257268	7.81991e-06	1.65557e-06
800	0.944159	0.0296777	0.0261372	2.15414e-05	4.73245e-06

## Sheet: lA
lA
T[K]	G(T) [eV]
	1-1	1-2	1-3	1-4	2-2	2-3	2-4	3-3	3-4	4-4
300	-570.106	-570.213	-570.097	-569.999	-569.906	-570.155	-570.003	-570.375	-569.923	-570.338
325	-570.197	-570.303	-570.187	-570.089	-569.992	-570.244	-570.094	-570.465	-570.013	-570.43
350	-570.294	-570.398	-570.282	-570.184	-570.082	-570.339	-570.189	-570.56	-570.107	-570.526
375	-570.395	-570.498	-570.382	-570.284	-570.176	-570.439	-570.29	-570.66	-570.206	-570.627
400	-570.5	-570.602	-570.486	-570.389	-570.275	-570.543	-570.394	-570.764	-570.308	-570.733
425	-570.611	-570.711	-570.595	-570.498	-570.378	-570.652	-570.504	-570.873	-570.415	-570.844
450	-570.726	-570.825	-570.709	-570.612	-570.486	-570.765	-570.618	-570.987	-570.526	-570.958
475	-570.845	-570.943	-570.827	-570.73	-570.597	-570.883	-570.736	-571.104	-570.64	-571.078
500	-570.968	-571.065	-570.949	-570.852	-570.712	-571.005	-570.858	-571.226	-570.758	-571.201
525	-571.096	-571.191	-571.075	-570.978	-570.832	-571.131	-570.984	-571.352	-570.88	-571.328
550	-571.227	-571.321	-571.205	-571.108	-570.955	-571.26	-571.115	-571.482	-571.005	-571.46
575	-571.362	-571.455	-571.338	-571.242	-571.081	-571.394	-571.249	-571.615	-571.133	-571.595
600	-571.501	-571.592	-571.476	-571.38	-571.211	-571.531	-571.387	-571.753	-571.265	-571.733
625	-571.644	-571.734	-571.617	-571.521	-571.344	-571.672	-571.528	-571.894	-571.4	-571.876
650	-571.79	-571.878	-571.761	-571.666	-571.481	-571.816	-571.673	-572.038	-571.538	-572.022
675	-571.939	-572.026	-571.909	-571.814	-571.621	-571.964	-571.821	-572.186	-571.679	-572.171
700	-572.092	-572.178	-572.061	-571.965	-571.764	-572.115	-571.972	-572.337	-571.822	-572.323
725	-572.248	-572.332	-572.215	-572.12	-571.91	-572.269	-572.127	-572.491	-571.969	-572.479
750	-572.406	-572.49	-572.372	-572.277	-572.059	-572.426	-572.285	-572.649	-572.118	-572.638
775	-572.569	-572.65	-572.533	-572.438	-572.211	-572.587	-572.445	-572.809	-572.27	-572.8
800	-572.733	-572.814	-572.696	-572.602	-572.365	-572.75	-572.609	-572.972	-572.425	-572.964
	IR Wavenumbers [1/cm]
	3676.85	3664.09	3657.48	3635.21	3623.05	3636.08	3629.25	3638.87	3602.08	3648.08
	3671.85	3637.95	3624.59	3608.48	3604.53	3634.34	3581.23	3637.92	3565.66	3646.84
	P (T)
300	2.41009e-05	0.00148323	1.69767e-05	3.78338e-07	1.06749e-08	0.00015758	4.55788e-07	0.807403	2.04922e-08	0.190914
400	0.000335221	0.0063999	0.000222465	1.31134e-05	4.85983e-07	0.00115909	1.54477e-05	0.705813	1.26679e-06	0.28604
500	0.00158317	0.0148784	0.00100481	0.000106121	4.17552e-06	0.00369647	0.000122748	0.6282	1.20234e-05	0.350393
600	0.00437234	0.0255357	0.0026814	0.000417643	1.59515e-05	0.00781478	0.000475997	0.567833	4.53672e-05	0.390808
700	0.00889515	0.0369208	0.00530929	0.00109128	3.88293e-05	0.0130954	0.00122894	0.519006	0.000102418	0.414312
800	0.0149555	0.0480018	0.00873408	0.00221025	7.18615e-05	0.0190025	0.00246472	0.478228	0.000169557	0.426162

## Sheet: lB
lB
T[K]	G(T) [eV]
	1-1	1-2	1-3	1-4	2-1	2-2	2-3	2-4	3-1	3-2	3-3	3-4	4-1	4-2	4-3	4-4
300	-570.156	-570.018	-569.974	-569.974	-570.029	-569.96	-569.903	-569.909	-570.09	-569.917	-569.888	-569.853	-570.008	-569.959	-569.985	-569.965
325	-570.246	-570.107	-570.064	-570.065	-570.12	-570.049	-569.993	-570	-570.18	-570.007	-569.978	-569.944	-570.097	-570.049	-570.076	-570.056
350	-570.341	-570.202	-570.159	-570.16	-570.215	-570.143	-570.087	-570.096	-570.275	-570.102	-570.073	-570.04	-570.19	-570.144	-570.171	-570.153
375	-570.441	-570.301	-570.259	-570.261	-570.316	-570.242	-570.187	-570.197	-570.374	-570.202	-570.173	-570.14	-570.288	-570.243	-570.271	-570.255
400	-570.546	-570.405	-570.363	-570.366	-570.421	-570.346	-570.291	-570.303	-570.478	-570.306	-570.277	-570.245	-570.39	-570.348	-570.376	-570.361
425	-570.655	-570.513	-570.472	-570.475	-570.531	-570.454	-570.4	-570.414	-570.587	-570.415	-570.386	-570.355	-570.496	-570.457	-570.485	-570.472
450	-570.768	-570.626	-570.586	-570.589	-570.645	-570.567	-570.514	-570.529	-570.7	-570.528	-570.5	-570.469	-570.606	-570.57	-570.599	-570.587
475	-570.886	-570.743	-570.703	-570.707	-570.763	-570.684	-570.631	-570.648	-570.817	-570.645	-570.618	-570.588	-570.72	-570.688	-570.716	-570.707
500	-571.008	-570.864	-570.825	-570.83	-570.886	-570.805	-570.753	-570.771	-570.939	-570.767	-570.74	-570.71	-570.837	-570.81	-570.839	-570.831
525	-571.134	-570.99	-570.951	-570.956	-571.012	-570.93	-570.879	-570.898	-571.064	-570.893	-570.866	-570.837	-570.958	-570.935	-570.965	-570.958
550	-571.264	-571.119	-571.081	-571.086	-571.143	-571.059	-571.009	-571.029	-571.194	-571.022	-570.996	-570.967	-571.083	-571.065	-571.095	-571.09
575	-571.398	-571.252	-571.215	-571.22	-571.277	-571.192	-571.142	-571.164	-571.327	-571.156	-571.129	-571.102	-571.211	-571.199	-571.229	-571.225
600	-571.535	-571.389	-571.352	-571.358	-571.415	-571.328	-571.28	-571.303	-571.464	-571.293	-571.267	-571.24	-571.342	-571.336	-571.366	-571.364
625	-571.676	-571.529	-571.493	-571.5	-571.557	-571.468	-571.42	-571.445	-571.605	-571.434	-571.408	-571.381	-571.476	-571.476	-571.507	-571.507
650	-571.821	-571.673	-571.638	-571.644	-571.702	-571.612	-571.565	-571.591	-571.749	-571.578	-571.552	-571.526	-571.613	-571.621	-571.652	-571.653
675	-571.969	-571.82	-571.786	-571.793	-571.851	-571.759	-571.712	-571.74	-571.896	-571.725	-571.7	-571.675	-571.754	-571.768	-571.8	-571.803
700	-572.12	-571.97	-571.937	-571.944	-572.002	-571.909	-571.863	-571.892	-572.047	-571.876	-571.852	-571.826	-571.897	-571.919	-571.951	-571.955
725	-572.274	-572.124	-572.091	-572.099	-572.157	-572.062	-572.017	-572.048	-572.201	-572.03	-572.006	-571.981	-572.043	-572.073	-572.105	-572.111
750	-572.432	-572.281	-572.248	-572.257	-572.315	-572.219	-572.175	-572.206	-572.358	-572.187	-572.163	-572.139	-572.191	-572.23	-572.263	-572.27
775	-572.592	-572.441	-572.409	-572.417	-572.477	-572.378	-572.335	-572.368	-572.518	-572.347	-572.324	-572.3	-572.343	-572.391	-572.423	-572.433
800	-572.756	-572.603	-572.572	-572.581	-572.641	-572.541	-572.498	-572.533	-572.681	-572.511	-572.488	-572.464	-572.497	-572.554	-572.587	-572.598
	IR Wavenumbers [1/cm]
	3666.38	3643.53	3636.96	3643.05	3672.12	3635.46	3636.7	3645.6	3669.54	3633.11	3640.54	3628.94	3641.41	3642.44	3628.54	3614.19
	3654.29	3633.55	3636.57	3631.28	3646.88	3622.51	3615.56	3621.12	3621.86	3624.97	3631.08	3624.64	3618.9	3622.97	3618.35	3612.6
	P (T)
300	0.909798	0.00431285	0.000794814	0.000802716	0.00667114	0.000456057	5.03477e-05	6.31731e-05	0.0717717	8.91547e-05	2.83456e-05	7.50651e-06	0.00292688	0.000439527	0.00123613	0.000551859
400	0.814242	0.0136971	0.00409964	0.00439293	0.0218512	0.00248789	0.000512606	0.00072266	0.115385	0.000776873	0.000338105	0.000134642	0.0089556	0.00263187	0.00588934	0.00388198
500	0.707697	0.0253142	0.0102085	0.0112662	0.0414306	0.00634597	0.00191281	0.00288277	0.142181	0.0026389	0.00139464	0.000705605	0.0135155	0.00708581	0.0138821	0.0115388
600	0.607124	0.0358096	0.0176839	0.0198288	0.0598081	0.0111112	0.00432982	0.00680661	0.153762	0.00560877	0.00338471	0.00200208	0.014454	0.0128461	0.0230853	0.0223559
700	0.520692	0.043831	0.0250698	0.0283651	0.0743937	0.0158229	0.00742094	0.0120046	0.155503	0.00918822	0.00610718	0.0040307	0.0129253	0.0187406	0.0317056	0.0341986
800	0.449864	0.0494035	0.0315896	0.0359312	0.0849451	0.0199668	0.0107723	0.0177862	0.151983	0.0128916	0.00922286	0.00659987	0.0105129	0.0240701	0.0389511	0.0455101

## Sheet: lC
lC
T[K]	G(T) [eV]
	1-1	1-2	1-3	1-4	2-1	2-2	2-3	2-4	3-1	3-2	3-3	3-4	4-1	4-2	4-3	4-4
300	-569.98	-569.965	-569.933	-569.937	-569.95	-569.975	-569.91	-569.938	-569.913	-569.948	-569.885	-569.858	-570.004	-569.946	-569.962	-569.913
325	-570.07	-570.055	-570.023	-570.029	-570.039	-570.066	-569.999	-570.028	-570.003	-570.038	-569.975	-569.949	-570.094	-570.034	-570.052	-570.003
350	-570.165	-570.149	-570.118	-570.126	-570.133	-570.161	-570.093	-570.123	-570.098	-570.134	-570.07	-570.044	-570.189	-570.127	-570.147	-570.098
375	-570.265	-570.248	-570.217	-570.228	-570.232	-570.261	-570.191	-570.222	-570.199	-570.234	-570.17	-570.145	-570.288	-570.225	-570.246	-570.198
400	-570.37	-570.351	-570.321	-570.334	-570.335	-570.366	-570.295	-570.326	-570.303	-570.339	-570.274	-570.25	-570.393	-570.326	-570.35	-570.302
425	-570.479	-570.46	-570.43	-570.445	-570.443	-570.476	-570.403	-570.435	-570.413	-570.448	-570.383	-570.359	-570.502	-570.431	-570.459	-570.411
450	-570.592	-570.572	-570.543	-570.561	-570.555	-570.589	-570.515	-570.548	-570.526	-570.562	-570.496	-570.473	-570.615	-570.541	-570.572	-570.524
475	-570.71	-570.689	-570.66	-570.681	-570.672	-570.707	-570.631	-570.666	-570.645	-570.68	-570.614	-570.592	-570.732	-570.654	-570.689	-570.642
500	-570.832	-570.81	-570.782	-570.804	-570.793	-570.829	-570.752	-570.787	-570.767	-570.803	-570.736	-570.714	-570.854	-570.77	-570.811	-570.763
525	-570.958	-570.935	-570.908	-570.932	-570.918	-570.955	-570.877	-570.913	-570.893	-570.929	-570.862	-570.84	-570.98	-570.891	-570.936	-570.889
550	-571.088	-571.064	-571.037	-571.064	-571.046	-571.085	-571.005	-571.042	-571.023	-571.059	-570.991	-570.971	-571.11	-571.014	-571.066	-571.019
575	-571.221	-571.196	-571.171	-571.2	-571.179	-571.219	-571.138	-571.175	-571.157	-571.193	-571.125	-571.105	-571.243	-571.142	-571.199	-571.152
600	-571.359	-571.333	-571.308	-571.339	-571.315	-571.357	-571.274	-571.312	-571.295	-571.331	-571.262	-571.243	-571.38	-571.272	-571.336	-571.289
625	-571.5	-571.473	-571.448	-571.482	-571.455	-571.498	-571.414	-571.453	-571.436	-571.472	-571.403	-571.384	-571.521	-571.405	-571.477	-571.43
650	-571.644	-571.616	-571.592	-571.629	-571.598	-571.642	-571.557	-571.597	-571.581	-571.617	-571.548	-571.529	-571.665	-571.542	-571.621	-571.574
675	-571.792	-571.763	-571.74	-571.778	-571.745	-571.79	-571.703	-571.744	-571.729	-571.765	-571.695	-571.678	-571.813	-571.681	-571.768	-571.722
700	-571.943	-571.913	-571.891	-571.931	-571.895	-571.941	-571.853	-571.895	-571.881	-571.916	-571.846	-571.829	-571.964	-571.824	-571.919	-571.873
725	-572.097	-572.066	-572.045	-572.088	-572.048	-572.096	-572.006	-572.048	-572.035	-572.071	-572	-571.984	-572.118	-571.969	-572.073	-572.027
750	-572.255	-572.223	-572.202	-572.247	-572.204	-572.253	-572.162	-572.205	-572.193	-572.228	-572.158	-572.142	-572.275	-572.117	-572.23	-572.184
775	-572.415	-572.382	-572.362	-572.41	-572.364	-572.414	-572.321	-572.365	-572.354	-572.389	-572.318	-572.303	-572.435	-572.267	-572.39	-572.344
800	-572.578	-572.544	-572.525	-572.575	-572.526	-572.577	-572.483	-572.528	-572.518	-572.553	-572.481	-572.467	-572.598	-572.42	-572.552	-572.507
	IR Wavenumbers [1/cm]
	3663.39	3658.65	3656.49	3668.38	3657.46	3619.44	3623.67	3620.25	3663.05	3621.32	3637.95	3631.14	3649.77	3619.51	3630.91	3625.7
	3653.54	3554.26	3618.28	3644.92	3607.1	3594.16	3605.46	3613.32	3631.79	3598.39	3620.46	3622.41	3621.15	3589.38	3625.83	3614.54
	P (T)
300	0.14359	0.0797299	0.023046	0.0269759	0.0437951	0.118409	0.00940482	0.0280038	0.0105363	0.0405908	0.00359394	0.00127718	0.35172	0.037922	0.0708486	0.0105568
400	0.134142	0.0789473	0.0329316	0.0481907	0.0491817	0.121423	0.0152942	0.0382526	0.0196198	0.0552406	0.00836552	0.00414367	0.26129	0.0377388	0.0764163	0.0188226
500	0.12552	0.0756239	0.0396641	0.0666116	0.0509676	0.118698	0.0197676	0.0445054	0.0278278	0.0640862	0.0135373	0.00816365	0.211572	0.0302561	0.0774619	0.0257359
600	0.118569	0.0721043	0.0442808	0.0815957	0.0513142	0.114592	0.0230461	0.0483373	0.0347159	0.0694137	0.0184212	0.0126462	0.180737	0.022169	0.0769086	0.0311485
700	0.112958	0.0689022	0.0475024	0.0935516	0.0510406	0.110385	0.0254478	0.0507103	0.0403574	0.0726348	0.0227742	0.0171345	0.15986	0.0156598	0.0757646	0.0353165
800	0.10836	0.0661109	0.0497961	0.103083	0.0505031	0.106485	0.0272285	0.0521928	0.0449582	0.0745836	0.026562	0.0213926	0.144833	0.0109388	0.074438	0.0385349
